# Supplementary material for: Simultaneous Determination of 14 Phenolic Compounds in Grape Canes by HPLC-DAD-UV Using Wavelength Switching Detection
Source: PubMed Central journal article supplement (PMC6269983; doi:10.3390/molecules181114241), 2013-11-18
Supplement: molecules-18-14241-s001.pdf [file molecules-18-14241-s001.pdf]

## Supplementary Materials

**Table S1.** Contents of individual phenolic compounds in 89 varieties of one-year-old grape canes (mg kg<sup>-1</sup> of fresh cane powder).

| Variety<br>( <i>V. vinifera</i> L.) | Gallic acid  | Protocatechuic acid | Catechin       | Vanillic acid | Caffeic acid | Syringic acid | Epicatechin    | <i>p</i> -Coumaric acid | Rutin        | Salicylic acid | Coumarin     | <i>trans</i> -Resveratrol | Morin         | Quercetin    |
|-------------------------------------|--------------|---------------------|----------------|---------------|--------------|---------------|----------------|-------------------------|--------------|----------------|--------------|---------------------------|---------------|--------------|
| 8804                                | 48.29 ± 2.43 | 143.93 ± 3.42       | 593.31 ± 18.40 | 47.56 ± 1.45  | 45.58 ± 2.35 | 98.84 ± 3.28  | 543.34 ± 13.84 | 81.43 ± 3.47            | 72.52 ± 1.85 | 181.65 ± 1.87  | 35.55 ± 0.57 | 789.93 ± 35.67            | 164.56 ± 5.39 | 74.51 ± 2.49 |
| Alicante Bouschet                   | 26.22 ± 0.41 | 154.53 ± 2.33       | 548.08 ± 15.79 | 55.98 ± 2.12  | 58.22 ± 2.87 | 102.07 ± 6.77 | 512.63 ± 24.58 | 76.63 ± 1.79            | 85.73 ± 1.32 | 170.54 ± 2.42  | 21.76 ± 0.93 | 920.97 ± 33.28            | 180.37 ± 4.30 | 85.76 ± 2.06 |
| Aligoté                             | 17.65 ± 0.62 | 117.31 ± 2.35       | 436.63 ± 16.43 | 23.72 ± 0.76  | 45.82 ± 0.93 | 85.53 ± 1.76  | 402.54 ± 31.44 | 94.32 ± 2.92            | 64.53 ± 2.43 | 182.66 ± 4.92  | 49.58 ± 1.05 | 837.65 ± 43.50            | 132.52 ± 5.49 | 67.88 ± 3.39 |
| Angelina                            | 15.3 ± 0.26  | 121.34 ± 1.78       | 557.39 ± 15.65 | 35.73 ± 2.09  | 36.48 ± 0.68 | 87.36 ± 3.78  | 415.37 ± 23.42 | 71.84 ± 2.28            | 66.77 ± 0.93 | 171.05 ± 6.45  | 22.74 ± 1.47 | 923.04 ± 38.49            | 184.49 ± 5.74 | 68.57 ± 3.67 |
| Augusta                             | 25.76 ± 0.87 | 104.58 ± 4.32       | 389.29 ± 18.58 | 19.74 ± 0.48  | 30.94 ± 1.32 | 84.29 ± 2.48  | 478.45 ± 23.12 | 85.28 ± 3.75            | 59.18 ± 1.38 | 193.49 ± 7.33  | 44.29 ± 0.48 | 789.38 ± 27.38            | 149.48 ± 3.29 | 56.38 ± 2.67 |
| Autumn Black                        | 21.88 ± 0.17 | 124.82 ± 2.47       | 611.94 ± 23.43 | 39.84 ± 1.37  | 49.57 ± 0.94 | 73.63 ± 3.78  | 521.24 ± 23.41 | 74.52 ± 1.78            | 62.88 ± 0.74 | 168.36 ± 5.83  | 22.77 ± 0.82 | 906.73 ± 24.52            | 193.82 ± 4.53 | 69.61 ± 1.45 |
| Autumn Royal                        | 24.76 ± 1.21 | 110.43 ± 5.29       | 432.48 ± 15.98 | 23.54 ± 1.13  | 38.25 ± 2.48 | 74.29 ± 2.18  | 468.65 ± 23.74 | 104.38 ± 3.24           | 62.68 ± 1.45 | 174.39 ± 5.38  | 38.49 ± 0.45 | 1022.38 ± 43.18           | 155.29 ± 5.58 | 65.28 ± 2.43 |
| Autumn White                        | 34.54 ± 1.28 | 122.61 ± 3.39       | 398.76 ± 16.76 | 26.21 ± 0.74  | 35.40 ± 1.43 | 81.81 ± 2.22  | 417.70 ± 24.85 | 96.00 ± 1.38            | 55.28 ± 2.54 | 168.69 ± 4.82  | 33.08 ± 0.74 | 878.96 ± 29.43            | 152.33 ± 5.49 | 68.42 ± 2.48 |
| Baibigebuer                         | 25.43 ± 1.04 | 109.48 ± 2.65       | 452.49 ± 17.58 | 17.87 ± 0.64  | 42.32 ± 2.14 | 68.29 ± 2.31  | 423.76 ± 22.41 | 88.39 ± 2.38            | 49.75 ± 2.31 | 186.39 ± 8.32  | 44.44 ± 0.48 | 859.29 ± 33.29            | 98.28 ± 2.18  | 58.29 ± 3.01 |
| Baidehai                            | 28.75 ± 1.32 | 112.38 ± 3.82       | 410.38 ± 15.82 | 25.65 ± 1.32  | 30.26 ± 1.43 | 76.47 ± 3.18  | 455.56 ± 18.94 | 94.81 ± 2.18            | 68.47 ± 2.43 | 175.58 ± 5.30  | 46.39 ± 0.65 | 943.67 ± 28.65            | 102.48 ± 3.92 | 55.34 ± 2.76 |
| Blauer Trollinger                   | 36.38 ± 2.23 | 139.91 ± .521       | 732.48 ± 27.93 | 38.39 ± 2.28  | 29.44 ± 0.63 | 80.28 ± 3.87  | 521.53 ± 16.84 | 67.29 ± 1.38            | 84.28 ± 2.11 | 159.44 ± 6.06  | 29.54 ± 0.48 | 848.27 ± 33.18            | 168.39 ± 6.43 | 70.66 ± 3.23 |
| Blue French                         | 40.11 ± 1.34 | 126.53 ± 2.31       | 538.81 ± 15.66 | 48.32 ± 2.37  | 53.24 ± 2.39 | 71.81 ± 0.89  | 582.42 ± 20.89 | 80.22 ± 1.88            | 68.40 ± 1.25 | 178.92 ± 4.49  | 18.57 ± 1.73 | 1082.99 ± 35.04           | 177.51 ± 5.18 | 77.76 ± 2.67 |
| Bourboulenc                         | 34.82 ± 0.88 | 119.53 ± 1.32       | 427.13 ± 14.47 | 24.35 ± 1.38  | 38.53 ± 0.87 | 88.73 ± 5.53  | 369.21 ± 14.65 | 71.76 ± 1.68            | 56.22 ± 2.71 | 171.90 ± 3.53  | 42.91 ± 1.96 | 981.86 ± 29.84            | 98.36 ± 3.48  | 67.92 ± 2.23 |
| Cabernet Franc                      | 23.03 ± 0.78 | 126.47 ± 2.35       | 436.61 ± 18.49 | 47.56 ± 2.82  | 50.48 ± 1.38 | 84.38 ± 3.12  | 615.81 ± 33.79 | 79.37 ± 2.22            | 84.75 ± 2.12 | 169.28 ± 3.89  | 25.67 ± 0.78 | 1103.57 ± 49.93           | 183.94 ± 6.40 | 83.56 ± 4.06 |
| Cabernet Gemischt                   | 24.53 ± 0.78 | 132.10 ± 2.44       | 736.22 ± 26.25 | 40.26 ± 1.79  | 43.65 ± 0.85 | 86.28 ± 2.73  | 449.44 ± 34.75 | 75.31 ± 1.85            | 81.30 ± 0.95 | 168.59 ± 4.88  | 21.64 ± 0.92 | 973.36 ± 23.88            | 173.42 ± 7.58 | 77.89 ± 1.93 |
| Cabernet Sauvignon                  | 42.94 ± 1.38 | 142.01 ± 2.31       | 741.35 ± 26.46 | 43.81 ± 1.82  | 45.38 ± 1.38 | 110.96 ± 0.72 | 547.91 ± 23.39 | 79.78 ± 2.22            | 90.46 ± 4.40 | 176.08 ± 2.47  | 26.28 ± 0.82 | 1038.55 ± 35.31           | 194.82 ± 3.38 | 88.05 ± 3.18 |
| Carignane                           | 34.89 ± 0.98 | 117.75 ± 4.43       | 729.27 ± 25.76 | 34.28 ± 0.91  | 55.23 ± 2.43 | 84.08 ± 5.88  | 417.33 ± 14.93 | 74.47 ± 1.38            | 55.84 ± 1.82 | 169.91 ± 6.21  | 23.75 ± 1.44 | 732.62 ± 20.63            | 160.42 ± 6.75 | 72.73 ± 1.92 |
| Centennial Seedless                 | 26.47 ± 1.20 | 98.45 ± 3.56        | 439.29 ± 16.92 | 22.37 ± 0.73  | 36.58 ± 1.48 | 75.38 ± 3.19  | 398.87 ± 12.56 | 90.28 ± 2.68            | 69.29 ± 2.05 | 194.58 ± 6.38  | 37.19 ± 2.15 | 873.19 ± 22.34            | 69.32 ± 2.19  | 63.29 ± 2.43 |
| Chardonnay                          | 15.57 ± 1.42 | 108.08 ± 1.21       | 489.66 ± 13.46 | 19.44 ± 0.93  | 66.48 ± 2.84 | 94.83 ± 2.72  | 406.85 ± 21.34 | 85.90 ± 2.51            | 53.50 ± 1.30 | 170.40 ± 4.98  | 51.77 ± 0.88 | 826.88 ± 25.43            | 130.47 ± 5.31 | 67.88 ± 2.08 |
| Chenin Blanc                        | 57.21 ± 1.83 | 126.05 ± 4.32       | 395.75 ± 15.47 | 23.18 ± 1.30  | 39.33 ± 2.05 | 78.39 ± 3.78  | 391.11 ± 6.73  | 97.28 ± 2.88            | 62.01 ± 1.84 | 198.71 ± 4.63  | 46.99 ± 0.88 | 765.29 ± 25.59            | 121.33 ± 4.53 | 60.38 ± 2.76 |

Table S1. Cont.

| Variety<br>( <i>V. vinifera</i> L) | Gallic acid  | Protocatechuic acid | Catechin       | Vanillic acid | Caffeic acid | Syringic acid | Epicatechin    | <i>p</i> -Coumaric acid | Rutin        | Salicylic acid | Coumarin     | <i>trans</i> -Resveratrol | Morin         | Quercetin    |
|------------------------------------|--------------|---------------------|----------------|---------------|--------------|---------------|----------------|-------------------------|--------------|----------------|--------------|---------------------------|---------------|--------------|
| Cinsaut                            | 37.22 ± 0.98 | 111.12 ± 3.31       | 526.03 ± 15.56 | 45.28 ± 1.98  | 56.23 ± 2.54 | 92.26 ± 4.69  | 544.86 ± 22.94 | 88.88 ± 2.55            | 67.02 ± 2.79 | 176.68 ± 4.20  | 22.77 ± 0.93 | 922.32 ± 22.79            | 148.50 ± 3.65 | 81.76 ± 0.82 |
| Colombard                          | 34.58 ± 0.85 | 103.44 ± 4.28       | 469.29 ± 16.38 | 34.92 ± 2.03  | 41.38 ± 1.55 | 77.23 ± 3.10  | 438.39 ± 21.23 | 108.38 ± 4.21           | 61.28 ± 2.30 | 204.39 ± 9.48  | 43.19 ± 1.50 | 749.48 ± 33.18            | 143.39 ± 4.28 | 56.49 ± 1.38 |
| Crimson Seedless                   | 29.08 ± 0.68 | 115.47 ± 3.28       | 531.03 ± 14.29 | 30.38 ± 0.94  | 38.54 ± 1.43 | 83.48 ± 2.82  | 453.94 ± 18.23 | 85.29 ± 3.11            | 71.49 ± 3.28 | 169.39 ± 5.35  | 19.83 ± 0.67 | 759.35 ± 35.10            | 118.54 ± 3.21 | 58.29 ± 3.04 |
| Ecoly                              | 21.44 ± 0.98 | 124.63 ± 2.31       | 453.68 ± 15.67 | 38.24 ± 2.31  | 40.23 ± 2.04 | 80.20 ± 2.69  | 370.28 ± 13.85 | 94.21 ± 1.23            | 51.70 ± 0.78 | 171.46 ± 1.92  | 33.63 ± 1.22 | 663.77 ± 19.87            | 105.69 ± 5.42 | 67.74 ± 1.16 |
| Fenghuang 51                       | 17.54 ± 0.63 | 107.20 ± 2.08       | 479.64 ± 15.63 | 41.32 ± 1.59  | 44.25 ± 1.59 | 79.02 ± 2.31  | 477.71 ± 32.12 | 70.55 ± 1.88            | 67.79 ± 1.95 | 168.76 ± 3.84  | 35.27 ± 0.83 | 1350.91 ± 29.93           | 134.48 ± 5.23 | 68.28 ± 2.38 |
| Flamming Muscat                    | 40.22 ± 1.88 | 122.15 ± 2.43       | 473.66 ± 14.63 | 38.41 ± 2.11  | 36.34 ± 1.49 | 88.16 ± 5.45  | 405.21 ± 31.53 | 72.80 ± 1.82            | 53.33 ± 1.74 | 168.45 ± 5.76  | 28.83 ± 0.57 | 749.86 ± 15.65            | 140.35 ± 7.27 | 69.73 ± 2.32 |
| Gamay                              | 36.28 ± 0.22 | 119.75 ± 4.18       | 512.79 ± 12.34 | 40.23 ± 2.81  | 57.38 ± 1.46 | 72.49 ± 5.52  | 372.01 ± 11.99 | 71.58 ± 1.65            | 73.83 ± 1.92 | 171.01 ± 3.42  | 25.56 ± 0.77 | 960.50 ± 21.98            | 161.19 ± 5.94 | 69.85 ± 3.45 |
| Gamay Blanc                        | 16.53 ± 0.52 | 127.27 ± 2.18       | 462.57 ± 15.78 | 27.54 ± 1.67  | 50.47 ± 1.39 | 86.47 ± 5.22  | 337.01 ± 8.77  | 72.05 ± 2.75            | 56.61 ± 0.68 | 183.45 ± 5.48  | 54.77 ± 1.35 | 856.53 ± 23.54            | 139.48 ± 7.55 | 68.14 ± 3.61 |
| Gamay Noir                         | 52.45 ± 1.52 | 151.56 ± 5.88       | 783.21 ± 29.95 | 36.36 ± 1.49  | 35.43 ± 0.78 | 93.76 ± 3.42  | 656.67 ± 22.76 | 86.04 ± 3.42            | 70.77 ± 1.32 | 173.76 ± 5.78  | 36.14 ± 1.12 | 1290.95 ± 93.48           | 163.85 ± 6.98 | 71.77 ± 2.68 |
| Gewürztraminer                     | 30.11 ± 1.93 | 105.61 ± 3.69       | 453.65 ± 12.67 | 39.28 ± 2.02  | 40.35 ± 1.79 | 74.58 ± 2.48  | 425.48 ± 17.77 | 77.93 ± 1.85            | 56.45 ± 2.72 | 176.16 ± 5.39  | 23.34 ± 0.92 | 825.03 ± 33.64            | 120.48 ± 4.62 | 69.04 ± 5.43 |
| Gouais Blanc                       | 26.26 ± 0.58 | 110.65 ± 2.43       | 416.03 ± 12.73 | 19.22 ± 2.10  | 38.28 ± 1.55 | 91.21 ± 2.66  | 387.28 ± 14.55 | 82.82 ± 1.88            | 52.52 ± 1.52 | 174.51 ± 4.83  | 31.95 ± 1.27 | 700.11 ± 29.03            | 139.50 ± 4.43 | 57.85 ± 1.20 |
| Granoir                            | 43.45 ± 1.58 | 128.90 ± 2.33       | 514.01 ± 16.33 | 35.21 ± 1.32  | 42.58 ± 1.84 | 87.94 ± 2.73  | 494.24 ± 25.83 | 77.89 ± 0.92            | 78.46 ± 1.86 | 175.68 ± 3.55  | 22.62 ± 0.48 | 852.19 ± 23.83            | 138.55 ± 3.41 | 68.63 ± 2.55 |
| Grenache Blanc                     | 15.79 ± 0.28 | 115.04 ± 2.31       | 356.77 ± 12.43 | 28.23 ± 1.52  | 40.22 ± 1.68 | 78.36 ± 0.74  | 435.64 ± 30.79 | 96.32 ± 1.52            | 53.22 ± 1.96 | 198.48 ± 4.83  | 30.84 ± 0.59 | 828.19 ± 26.32            | 135.84 ± 6.42 | 67.72 ± 1.98 |
| Guibao                             | 44.38 ± 0.89 | 129.59 ± 3.24       | 467.27 ± 16.44 | 35.30 ± 2.33  | 39.84 ± 1.93 | 100.79 ± 4.89 | 373.78 ± 10.42 | 74.65 ± 1.38            | 63.05 ± 0.92 | 171.67 ± 1.18  | 28.98 ± 1.21 | 761.11 ± 17.48            | 145.48 ± 6.48 | 78.77 ± 2.04 |
| Heijixin                           | 12.81 ± 0.16 | 112.42 ± 2.27       | 529.42 ± 13.46 | 38.43 ± 1.28  | 48.75 ± 2.11 | 71.89 ± 4.52  | 540.29 ± 29.51 | 72.60 ± 1.56            | 60.74 ± 2.54 | 169.11 ± 2.87  | 29.62 ± 1.65 | 676.23 ± 22.45            | 153.33 ± 7.43 | 69.88 ± 3.39 |
| Italian Riesling                   | 40.49 ± 1.53 | 109.25 ± 5.38       | 441.47 ± 14.43 | 33.67 ± 2.31  | 60.38 ± 2.34 | 72.24 ± 1.82  | 392.83 ± 26.76 | 105.46 ± 1.78           | 55.68 ± 2.13 | 201.68 ± 6.02  | 28.07 ± 0.78 | 728.83 ± 17.39            | 112.37 ± 4.73 | 70.22 ± 1.93 |
| Jasmin                             | 31.93 ± 0.32 | 112.74 ± 2.32       | 468.45 ± 15.73 | 45.32 ± 2.88  | 42.48 ± 2.48 | 75.92 ± 2.88  | 481.22 ± 19.72 | 70.31 ± 0.93            | 72.05 ± 1.42 | 169.68 ± 4.69  | 32.50 ± 3.45 | 918.00 ± 38.41            | 132.56 ± 5.83 | 68.83 ± 0.99 |
| Jingxiu                            | 27.14 ± 0.88 | 128.68 ± 2.36       | 558.77 ± 15.75 | 36.39 ± 1.97  | 41.39 ± 1.58 | 72.06 ± 2.79  | 510.14 ± 31.74 | 71.34 ± 1.84            | 69.17 ± 2.34 | 170.37 ± 4.21  | 28.00 ± 0.80 | 631.76 ± 23.29            | 140.35 ± 6.83 | 68.14 ± 1.55 |
| Jingyu                             | 54.29 ± 1.98 | 134.37 ± 4.13       | 409.58 ± 15.63 | 30.91 ± 1.44  | 58.54 ± 3.03 | 86.01 ± 2.76  | 443.69 ± 23.82 | 85.05 ± 2.33            | 74.39 ± 3.58 | 171.46 ± 6.49  | 29.91 ± 0.68 | 997.62 ± 42.42            | 132.42 ± 5.64 | 59.06 ± 2.89 |
| Jiubai                             | 58.8 ± 2.38  | 126.52 ± 2.30       | 497.93 ± 17.53 | 28.36 ± 0.38  | 50.24 ± 2.33 | 87.52 ± 3.52  | 487.59 ± 41.32 | 88.62 ± 1.79            | 68.44 ± 3.32 | 171.79 ± 4.56  | 33.00 ± 0.92 | 570.75 ± 22.54            | 114.76 ± 4.77 | 57.97 ± 2.22 |
| Lungyen                            | 32.32 ± 1.32 | 135.44 ± 2.34       | 484.67 ± 16.64 | 33.83 ± 1.34  | 48.56 ± 2.37 | 83.28 ± 5.53  | 556.16 ± 25.88 | 79.33 ± 2.14            | 50.93 ± 1.74 | 168.24 ± 5.53  | 27.69 ± 1.85 | 744.64 ± 21.58            | 123.37 ± 5.73 | 67.84 ± 2.88 |
| Manaizi                            | 14.67 ± 0.06 | 116.69 ± 2.33       | 453.59 ± 16.32 | 28.57 ± 1.48  | 63.25 ± 3.13 | 83.73 ± 4.63  | 377.58 ± 22.32 | 81.09 ± 1.75            | 63.24 ± 1.98 | 170.76 ± 5.83  | 44.32 ± 0.84 | 693.25 ± 27.46            | 144.85 ± 7.02 | 68.52 ± 1.92 |
| Manicule Finger                    | 30.91 ± 1.18 | 124.44 ± 3.35       | 707.72 ± 27.49 | 31.24 ± 1.17  | 50.89 ± 2.38 | 73.62 ± 2.54  | 384.61 ± 13.42 | 71.69 ± 1.09            | 55.41 ± 2.32 | 178.28 ± 4.44  | 24.72 ± 0.59 | 1074.03 ± 32.83           | 132.83 ± 5.84 | 67.81 ± 1.82 |
| Merlot                             | 14.53 ± 0.89 | 157.73 ± 3.34       | 839.69 ± 29.74 | 48.31 ± 2.57  | 43.28 ± 2.08 | 74.59 ± 4.71  | 540.13 ± 16.83 | 102.57 ± 2.39           | 70.63 ± 2.85 | 168.97 ± 4.36  | 28.05 ± 2.48 | 848.58 ± 24.49            | 176.43 ± 8.28 | 67.97 ± 2.69 |
| Mission                            | 26.19 ± 0.62 | 122.91 ± 4.42       | 589.94 ± 13.46 | 44.75 ± 2.55  | 45.25 ± 1.78 | 73.30 ± 2.12  | 656.80 ± 35.54 | 75.20 ± 1.02            | 83.34 ± 1.79 | 174.63 ± 5.56  | 24.11 ± 0.88 | 840.74 ± 25.21            | 167.69 ± 6.45 | 70.65 ± 3.21 |

Table S1. Cont.

| Variety<br>( <i>V. vinifera</i> L) | Gallic acid  | Protocatechuic acid | Catechin       | Vanillic acid | Caffeic acid | Syringic acid | Epicatechin    | <i>p</i> -Coumaric acid | Rutin        | Salicylic acid | Coumarin     | <i>trans</i> -Resveratrol | Morin         | Quercetin    |
|------------------------------------|--------------|---------------------|----------------|---------------|--------------|---------------|----------------|-------------------------|--------------|----------------|--------------|---------------------------|---------------|--------------|
| Monukka                            | 24.48 ± 1.20 | 137.58 ± 4.32       | 649.28 ± 16.92 | 38.67 ± 1.38  | 48.48 ± 2.18 | 84.65 ± 3.84  | 548.20 ± 20.19 | 72.18 ± 2.33            | 68.98 ± 2.66 | 153.58 ± 4.55  | 26.38 ± 0.85 | 698.39 ± 27.33            | 155.65 ± 4.78 | 68.94 ± 2.83 |
| Müller-Thurgau                     | 20.31 ± 0.89 | 167.97 ± 4.31       | 401.52 ± 15.82 | 31.73 ± 2.13  | 65.20 ± 3.32 | 103.59 ± 6.53 | 463.75 ± 21.83 | 131.67 ± 2.98           | 84.22 ± 7.73 | 227.96 ± 2.42  | 45.39 ± 0.87 | 664.66 ± 23.44            | 143.41 ± 5.32 | 67.96 ± 1.38 |
| Munage                             | 37.84 ± 1.12 | 131.38 ± 5.51       | 589.92 ± 13.32 | 38.56 ± 0.57  | 50.26 ± 2.87 | 76.24 ± 3.52  | 446.95 ± 13.75 | 85.38 ± 2.24            | 83.18 ± 2.86 | 175.64 ± 2.98  | 33.63 ± 1.08 | 615.57 ± 27.41            | 131.01 ± 5.57 | 69.37 ± 4.10 |
| Muscat Blanc                       | 19.12 ± 0.78 | 128.00 ± 4.32       | 465.90 ± 16.48 | 40.36 ± 1.04  | 66.39 ± 3.33 | 91.78 ± 2.42  | 469.17 ± 26.74 | 95.98 ± 1.52            | 69.07 ± 2.31 | 199.31 ± 3.62  | 38.88 ± 1.04 | 1047.44 ± 32.19           | 113.38 ± 4.89 | 57.87 ± 2.83 |
| Muscat Hamburg                     | 36.39 ± 0.52 | 129.91 ± 2.31       | 620.61 ± 17.46 | 42.39 ± 2.31  | 39.67 ± 1.85 | 138.32 ± 7.59 | 656.98 ± 27.89 | 85.58 ± 1.89            | 73.18 ± 1.65 | 168.92 ± 2.44  | 29.36 ± 1.13 | 1093.25 ± 45.59           | 167.91 ± 6.08 | 68.35 ± 2.52 |
| Muscat Mathiasz<br>Janosne         | 25.32 ± 0.98 | 127.85 ± 2.72       | 543.22 ± 15.77 | 36.19 ± 1.43  | 47.29 ± 2.54 | 85.43 ± 3.85  | 385.40 ± 19.73 | 75.38 ± 1.43            | 52.33 ± 1.82 | 168.95 ± 5.48  | 21.70 ± 1.02 | 1016.91 ± 48.83           | 142.36 ± 4.59 | 67.82 ± 2.30 |
| Muscat of<br>Alexandria            | 40.59 ± 2.08 | 125.07 ± 5.44       | 427.49 ± 13.87 | 40.81 ± 1.77  | 59.49 ± 1.55 | 87.96 ± 1.77  | 382.36 ± 16.78 | 84.49 ± 1.12            | 55.18 ± 0.69 | 181.22 ± 3.33  | 41.58 ± 1.09 | 908.93 ± 22.29            | 123.59 ± 6.44 | 62.55 ± 1.22 |
| Nebbiolo                           | 21.31 ± 0.48 | 125.27 ± 3.35       | 516.06 ± 18.52 | 44.29 ± 2.19  | 39.83 ± 0.83 | 86.54 ± 6.12  | 533.60 ± 30.78 | 78.58 ± 0.92            | 66.83 ± 0.88 | 170.41 ± 3.88  | 32.74 ± 0.98 | 898.91 ± 38.72            | 188.33 ± 5.28 | 68.58 ± 2.68 |
| Niunai                             | 30.78 ± 2.33 | 123.03 ± 2.54       | 428.49 ± 16.29 | 28.39 ± 1.93  | 53.69 ± 2.65 | 78.58 ± 2.32  | 398.28 ± 25.39 | 79.28 ± 2.32            | 65.58 ± 1.39 | 189.39 ± 5.39  | 29.54 ± 0.65 | 793.67 ± 22.48            | 109.50 ± 3.21 | 52.49 ± 1.66 |
| Pearl of Csaba                     | 19.39 ± 0.24 | 127.38 ± 2.31       | 428.64 ± 15.63 | 34.83 ± 2.14  | 66.45 ± 2.38 | 67.72 ± 2.85  | 380.43 ± 25.78 | 84.90 ± 2.44            | 59.45 ± 2.58 | 195.46 ± 3.57  | 28.05 ± 0.98 | 882.38 ± 21.29            | 120.36 ± 4.40 | 54.43 ± 2.75 |
| Petit Manseng                      | 34.84 ± 1.32 | 125.84 ± 4.32       | 357.66 ± 14.71 | 24.47 ± 0.73  | 59.29 ± 2.15 | 76.98 ± 4.02  | 367.10 ± 42.57 | 75.23 ± 1.33            | 58.89 ± 1.59 | 179.59 ± 4.59  | 29.80 ± 0.77 | 937.79 ± 27.47            | 122.48 ± 5.37 | 49.27 ± 3.54 |
| Petit Verdot                       | 33.38 ± 0.92 | 118.16 ± 5.38       | 629.96 ± 13.66 | 39.31 ± 1.32  | 41.32 ± 1.09 | 98.12 ± 5.41  | 452.08 ± 13.74 | 80.34 ± 4.72            | 73.85 ± 5.48 | 173.45 ± 6.39  | 19.77 ± 0.38 | 1288.13 ± 45.93           | 103.39 ± 4.63 | 79.88 ± 3.90 |
| Pinot Blanc                        | 19.37 ± 0.82 | 125.57 ± 1.34       | 345.32 ± 16.61 | 37.26 ± 0.88  | 63.32 ± 2.69 | 84.65 ± 4.75  | 410.93 ± 34.51 | 85.19 ± 2.20            | 60.43 ± 2.44 | 168.53 ± 4.53  | 36.65 ± 1.08 | 1192.34 ± 22.12           | 105.36 ± 5.15 | 61.76 ± 3.47 |
| Pinot Gris                         | 21.59 ± 0.33 | 127.32 ± 3.32       | 566.56 ± 24.76 | 41.30 ± 2.37  | 45.25 ± 1.94 | 90.41 ± 2.52  | 447.75 ± 12.42 | 76.75 ± 1.88            | 54.48 ± 1.66 | 170.55 ± 1.93  | 20.81 ± 0.04 | 1129.93 ± 13.89           | 169.40 ± 5.49 | 68.11 ± 3.32 |
| Pinot Noir                         | 19.39 ± 0.21 | 124.60 ± 1.78       | 565.79 ± 21.41 | 48.28 ± 2.75  | 42.10 ± 2.11 | 75.08 ± 4.54  | 459.28 ± 16.88 | 72.69 ± 1.86            | 67.41 ± 1.89 | 171.28 ± 5.58  | 19.62 ± 1.25 | 1551.55 ± 62.49           | 170.68 ± 6.59 | 77.81 ± 2.73 |
| Pollux                             | 24.77 ± 0.21 | 125.53 ± 2.31       | 412.89 ± 18.47 | 36.21 ± 2.31  | 57.22 ± 1.89 | 90.69 ± 4.51  | 480.22 ± 14.75 | 76.89 ± 1.59            | 54.66 ± 1.74 | 182.26 ± 2.43  | 30.71 ± 1.28 | 829.19 ± 13.44            | 105.47 ± 4.56 | 67.75 ± 4.49 |
| Queen of<br>Vineyard               | 28.97 ± 1.38 | 126.09 ± 2.33       | 427.37 ± 17.26 | 38.92 ± 2.47  | 60.21 ± 2.18 | 110.65 ± 2.29 | 431.04 ± 35.97 | 106.00 ± 2.79           | 85.92 ± 2.84 | 174.59 ± 4.92  | 23.26 ± 0.82 | 771.24 ± 15.43            | 132.47 ± 5.93 | 59.30 ± 3.13 |
| Red Globe                          | 39.09 ± 3.43 | 133.37 ± 2.98       | 540.29 ± 14.98 | 42.48 ± 2.67  | 44.73 ± 2.54 | 84.57 ± 3.48  | 482.38 ± 32.03 | 81.39 ± 3.41            | 68.95 ± 2.39 | 167.39 ± 5.82  | 25.49 ± 1.58 | 955.29 ± 30.39            | 168.52 ± 4.28 | 58.29 ± 2.55 |
| Red Guibao                         | 55.59 ± 1.78 | 118.04 ± 1.38       | 574.60 ± 14.42 | 39.04 ± 1.54  | 48.67 ± 2.13 | 76.05 ± 3.89  | 359.81 ± 20.32 | 74.33 ± 1.65            | 90.76 ± 3.76 | 178.55 ± 5.44  | 23.79 ± 1.22 | 992.45 ± 31.54            | 182.53 ± 6.59 | 69.93 ± 1.59 |
| Riesling                           | 31.26 ± 1.34 | 110.46 ± 2.65       | 430.86 ± 13.45 | 35.87 ± 2.13  | 58.28 ± 1.94 | 89.32 ± 4.64  | 397.39 ± 33.42 | 97.62 ± 1.58            | 61.02 ± 2.35 | 199.04 ± 4.93  | 39.75 ± 1.16 | 1072.17 ± 34.52           | 125.41 ± 4.59 | 58.17 ± 1.85 |
| Rizamat                            | 13.52 ± 0.78 | 112.32 ± 2.39       | 399.61 ± 11.41 | 30.84 ± 0.88  | 51.47 ± 2.19 | 81.08 ± 0.56  | 500.43 ± 39.43 | 71.56 ± 1.62            | 52.92 ± 1.52 | 168.87 ± 4.29  | 26.74 ± 0.84 | 703.44 ± 19.94            | 105.39 ± 5.32 | 62.12 ± 1.89 |
| Rkatsiteli                         | 17.88 ± 0.55 | 133.04 ± 2.32       | 492.61 ± 13.43 | 37.38 ± 1.05  | 63.31 ± 3.01 | 80.30 ± 6.55  | 451.37 ± 19.85 | 90.79 ± 1.32            | 56.80 ± 1.73 | 187.77 ± 4.72  | 43.40 ± 1.52 | 870.63 ± 26.92            | 112.55 ± 4.59 | 45.73 ± 3.75 |

Table S1. Cont.

| Variety<br>( <i>V. vinifera</i> L) | Gallic acid  | Protocatechuic acid | Catechin       | Vanillic acid | Caffeic acid | Syringic acid | Epicatechin    | <i>p</i> -Coumaric acid | Rutin        | Salicylic acid | Coumarin     | <i>trans</i> -Resveratrol | Morin         | Quercetin    |
|------------------------------------|--------------|---------------------|----------------|---------------|--------------|---------------|----------------|-------------------------|--------------|----------------|--------------|---------------------------|---------------|--------------|
| Roussanne Duvar                    | 22.34 ± 0.78 | 131.41 ± 4.31       | 600.44 ± 17.64 | 43.23 ± 3.12  | 55.63 ± 2.50 | 75.02 ± 2.89  | 523.00 ± 18.98 | 89.96 ± 2.34            | 52.96 ± 1.83 | 172.06 ± 4.69  | 23.31 ± 0.86 | 1154.51 ± 27.82           | 102.42 ± 3.58 | 68.23 ± 1.87 |
| Ruby Cabernet                      | 41.38 ± 2.89 | 137.92 ± 3.64       | 596.28 ± 18.29 | 46.92 ± 1.89  | 39.96 ± 1.49 | 87.48 ± 3.18  | 502.48 ± 21.39 | 79.29 ± 3.51            | 58.43 ± 1.86 | 180.38 ± 6.83  | 38.28 ± 1.55 | 983.45 ± 33.29            | 138.39 ± 4.29 | 70.39 ± 3.29 |
| Ruby Seedless                      | 47.65 ± 2.38 | 141.61 ± 5.36       | 514.28 ± 16.48 | 41.43 ± 1.75  | 53.86 ± 2.39 | 80.89 ± 5.57  | 459.93 ± 23.83 | 70.74 ± 1.88            | 56.55 ± 1.46 | 170.22 ± 4.84  | 23.45 ± 0.85 | 886.12 ± 24.822           | 187.36 ± 8.94 | 78.30 ± 4.02 |
| Sangiovese                         | 25.83 ± 0.58 | 142.84 ± 5.33       | 694.45 ± 13.58 | 48.28 ± 2.29  | 50.46 ± 1.86 | 83.84 ± 3.69  | 545.29 ± 35.58 | 72.91 ± 2.03            | 60.21 ± 2.55 | 169.25 ± 3.98  | 25.04 ± 1.73 | 850.53 ± 18.74            | 174.34 ± 6.54 | 69.14 ± 2.96 |
| Saperavi                           | 21.03 ± 1.04 | 117.72 ± 1.52       | 552.86 ± 17.65 | 46.84 ± 1.73  | 55.29 ± 2.14 | 80.72 ± 2.72  | 515.38 ± 25.70 | 70.73 ± 1.99            | 86.00 ± 4.79 | 169.45 ± 5.22  | 27.80 ± 1.40 | 780.86 ± 31.63            | 179.73 ± 5.42 | 70.04 ± 1.92 |
| Sauvignon Blanc                    | 17.23 ± 0.18 | 111.47 ± 2.31       | 545.60 ± 14.89 | 29.38 ± 1.38  | 71.30 ± 3.10 | 95.77 ± 2.79  | 418.09 ± 13.98 | 74.94 ± 1.67            | 52.94 ± 0.82 | 181.52 ± 2.68  | 38.93 ± 1.24 | 899.88 ± 19.98            | 134.51 ± 5.44 | 67.74 ± 3.08 |
| Seibel Noir                        | 41.36 ± 1.78 | 119.11 ± 1.36       | 658.23 ± 16.42 | 45.34 ± 2.44  | 58.32 ± 1.78 | 84.21 ± 3.62  | 467.78 ± 32.18 | 72.40 ± 1.26            | 64.18 ± 2.44 | 170.25 ± 4.12  | 21.93 ± 0.69 | 837.91 ± 34.31            | 176.59 ± 6.76 | 74.05 ± 2.54 |
| Semillon                           | 21.94 ± 0.58 | 135.69 ± 0.48       | 583.49 ± 21.44 | 27.38 ± 0.89  | 65.38 ± 2.32 | 100.67 ± 5.88 | 470.11 ± 23.45 | 89.63 ± 2.45            | 53.99 ± 1.61 | 169.75 ± 1.43  | 35.94 ± 0.75 | 1090.83 ± 12.42           | 142.32 ± 6.78 | 67.74 ± 1.96 |
| Shandongzaohong                    | 37.75 ± 1.43 | 122.03 ± 3.35       | 420.23 ± 14.42 | 38.31 ± 1.88  | 59.28 ± 3.02 | 94.55 ± 4.75  | 411.89 ± 20.48 | 73.78 ± 2.34            | 60.67 ± 0.72 | 172.19 ± 3.78  | 15.03 ± 1.05 | 941.76 ± 27.83            | 154.54 ± 4.92 | 78.88 ± 3.23 |
| Silvaner                           | 30.32 ± 2.14 | 123.94 ± 2.17       | 482.58 ± 15.92 | 37.19 ± 2.14  | 72.13 ± 2.89 | 77.39 ± 2.85  | 589.29 ± 14.93 | 88.35 ± 1.28            | 64.76 ± 2.70 | 184.38 ± 5.38  | 34.66 ± 0.89 | 1027.38 ± 33.28           | 105.34 ± 2.57 | 50.32 ± 2.56 |
| Syrah                              | 29.61 ± 0.08 | 126.53 ± 1.39       | 451.46 ± 16.11 | 46.32 ± 2.54  | 66.32 ± 2.53 | 88.96 ± 1.78  | 413.81 ± 18.75 | 75.73 ± 1.87            | 67.67 ± 1.75 | 172.21 ± 3.82  | 29.91 ± 0.66 | 897.11 ± 16.83            | 158.47 ± 4.83 | 83.78 ± 3.11 |
| Thompson Seedless                  | 21.48 ± 0.98 | 91.67 ± 2.24        | 344.69 ± 12.48 | 24.19 ± 0.58  | 65.36 ± 1.85 | 71.73 ± 1.42  | 450.36 ± 18.72 | 79.81 ± 1.62            | 50.39 ± 0.82 | 177.65 ± 5.58  | 28.56 ± 2.02 | 771.87 ± 10.31            | 133.27 ± 4.94 | 67.71 ± 4.05 |
| Ugni Blanc                         | 11.54 ± 1.42 | 124.33 ± 2.39       | 530.27 ± 13.76 | 33.38 ± 1.42  | 70.25 ± 2.41 | 87.51 ± 3.88  | 426.42 ± 20.38 | 101.97 ± 1.76           | 62.36 ± 2.63 | 198.41 ± 5.42  | 32.77 ± 1.28 | 801.50 ± 15.74            | 131.22 ± 5.48 | 61.88 ± 2.43 |
| Victoria Blanc                     | 29.25 ± 0.99 | 127.35 ± 1.28       | 575.74 ± 23.46 | 30.31 ± 0.88  | 68.82 ± 2.56 | 82.54 ± 1.92  | 410.08 ± 33.80 | 73.30 ± 0.98            | 62.78 ± 3.02 | 202.30 ± 5.33  | 20.13 ± 1.86 | 704.49 ± 25.32            | 122.33 ± 4.89 | 68.54 ± 1.86 |
| Wuyuezi                            | 44.54 ± 2.28 | 145.53 ± 3.45       | 776.14 ± 22.01 | 41.39 ± 3.04  | 49.93 ± 2.17 | 113.37 ± 4.54 | 646.65 ± 33.54 | 72.92 ± 1.76            | 54.67 ± 2.22 | 170.49 ± 3.77  | 25.13 ± 1.29 | 772.74 ± 32.89            | 178.51 ± 7.81 | 59.76 ± 2.03 |
| Xiabai                             | 20.02 ± 0.93 | 127.35 ± 5.42       | 389.84 ± 12.51 | 25.45 ± 0.76  | 68.35 ± 2.11 | 81.85 ± 4.76  | 484.65 ± 28.62 | 76.89 ± 2.02            | 63.97 ± 2.83 | 168.68 ± 3.37  | 33.11 ± 1.49 | 686.03 ± 24.53            | 130.55 ± 4.84 | 55.72 ± 3.12 |
| Yan73                              | 20.73 ± 3.38 | 119.88 ± 3.41       | 560.09 ± 15.55 | 41.30 ± 2.86  | 55.27 ± 2.52 | 82.17 ± 2.33  | 468.30 ± 22.02 | 77.75 ± 2.43            | 61.52 ± 2.29 | 160.84 ± 3.84  | 36.58 ± 1.43 | 628.75 ± 28.40            | 200.53 ± 7.43 | 69.42 ± 2.04 |
| Yan74                              | 15.89 ± 0.68 | 118.83 ± 1.38       | 536.38 ± 12.46 | 44.37 ± 3.11  | 60.39 ± 3.01 | 80.02 ± 4.68  | 461.99 ± 22.82 | 71.00 ± 1.42            | 55.93 ± 2.62 | 168.63 ± 5.02  | 39.67 ± 0.87 | 613.27 ± 20.82            | 195.34 ± 7.55 | 65.15 ± 2.84 |
| Zaobai                             | 16.21 ± 0.48 | 109.40 ± 2.12       | 306.86 ± 15.74 | 28.83 ± 0.83  | 79.48 ± 3.19 | 82.27 ± 2.40  | 413.14 ± 24.43 | 71.49 ± 1.77            | 55.01 ± 1.92 | 177.74 ± 4.29  | 29.58 ± 0.54 | 834.63 ± 28.32            | 142.84 ± 5.44 | 53.75 ± 2.37 |
| Zexiang                            | 16.08 ± 0.08 | 107.48 ± 1.25       | 406.80 ± 12.78 | 30.91 ± 1.32  | 77.29 ± 2.87 | 88.36 ± 4.73  | 368.25 ± 21.22 | 71.80 ± 1.79            | 58.60 ± 2.23 | 180.13 ± 4.18  | 32.80 ± 2.11 | 891.58 ± 32.45            | 138.39 ± 5.13 | 63.78 ± 3.91 |
| Zinfandel                          | 20.92 ± 0.38 | 123.68 ± 2.35       | 721.89 ± 18.47 | 45.29 ± 3.11  | 59.49 ± 1.98 | 88.29 ± 6.87  | 597.51 ± 23.57 | 79.25 ± 2.44            | 64.84 ± 1.46 | 171.05 ± 2.56  | 30.92 ± 1.44 | 706.57 ± 35.52            | 156.38 ± 5.99 | 69.74 ± 3.32 |
| Клерет белый<br>(Clairette Doree)  | 15.82 ± 1.23 | 124.79 ± 5.38       | 471.18 ± 13.48 | 35.82 ± 2.48  | 85.54 ± 3.19 | 95.58 ± 4.77  | 393.21 ± 13.40 | 77.90 ± 1.39            | 60.23 ± 2.34 | 175.97 ± 3.78  | 29.87 ± 0.88 | 892.40 ± 22.94            | 122.37 ± 3.66 | 69.57 ± 2.35 |
